# Supplementary material
Source: PubMed Central journal article supplement (PMC7271288)
Supplement: mmc1.pdf [file mmc1.pdf]

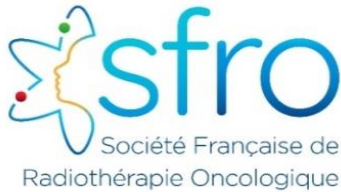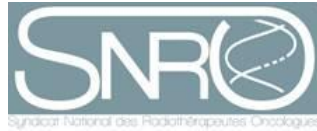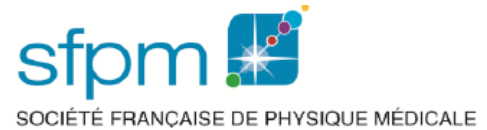

## Épidémie de COVID-19 : Recommandations à l'usage des professionnels de l'oncologie radiothérapie

La France est dans une phase épidémique de COVID-19 qui nous oblige à modifier nos organisations de travail. Bien qu'encore diversement touchés, nous sommes tous concernés pour limiter la propagation du virus. La **SFRO** associée à la **SFPM** et au **SNRO** a établi des recommandations à partir de celles en vigueur dans le pays.

Ces recommandations **peuvent évoluer rapidement** au gré des données concernant la propagation de l'épidémie et des nouvelles connaissances scientifiques dont nous disposerons. **Nous vous encourageons à consulter régulièrement le site du Gouvernement : <https://www.gouvernement.fr/info-coronavirus> et celui du HCSP : <https://www.hcsp.fr>**

En l'état actuel de la situation, quelques lignes directrices et généralités peuvent être isolées :

- **Dans le contexte du cancer, la première priorité est de ne pas interrompre les traitements et de ne pas retarder la prise en charge de nos patients. Il faut les informer et les rassurer des conditions de sécurité sanitaire prises dans les établissements et les encourager à suivre, ou poursuivre, leur radiothérapie.**
- **La seconde priorité est de protéger les personnels médicaux et paramédicaux sans lesquels aucun traitement ne pourrait être délivré.**
- **La majorité des infections par COVID-19 sont bénignes, voire asymptomatiques** : les personnes à risque de complications parfois mortelles sont principalement les personnes âgées, les personnes atteintes de pathologies chroniques ou recevant des thérapeutiques immunosuppressives. La majorité de nos patients fait donc partie de cette catégorie de personnes à risque. Des cas graves sporadiques chez des jeunes adultes sains restent cependant possibles.

– **La contamination** se fait essentiellement par contact rapproché par projection de gouttelettes nasopharyngées ou par contact par des mains souillées (malade et environnement), et possiblement à travers les conjonctives et liquides biologiques (urines, selles, etc.).

– **Il faut impérativement éviter le contact de patients « infectés » par le COVID-19 avec des patients atteints de cancer.** Si une prise en charge de patients "infectés" était nécessaire dans un service de radiothérapie, une séparation des patients dans un secteur isolé ou un parcours spécifique "protégé" serait à mettre en place.

## **Ainsi, les précautions suivantes sont recommandées :**

**Toute personne non indispensable au fonctionnement des structures de soins doit éviter de s'y rendre**, notamment les enfants, les accompagnants âgés de plus de 70 ans ou suivis pour une pathologie chronique, les accompagnants venant d'une zone à risque (Chine, Corée du Sud, Macao, Hong Kong, Singapour, Iran, Italie, **liste évolutive...**), ou les personnes présentant des symptômes infectieux (en particulier des signes pulmonaires et/ou de la fièvre, diarrhée récente).

### **1) Protection des personnels :**

#### **Bien appliquer les consignes habituelles :**

- Ne pas serrer les mains ou embrasser patients et collègues.
- Ne pas porter les mains à son visage en cours d'examen.
- Nettoyer les tables et accessoires à la lingette entre chaque patient avec le détergent-désinfectant habituel, comportant au minimum un ammonium quaternaire.
- Port de gants en cas de contact avec des liquides biologiques ou présence de lésions cutanées.
- Lavage des mains ou friction avec une solution hydroalcoolique (SHA) réguliers, et systématiquement entre chaque patient, après retrait des gants (préférer les SHA au lavage des mains), après être allé aux toilettes, avant les repas, après avoir utilisé les transports en commun.
- SHA fixés à disposition dans les salles d'attente et tous les lieux où se trouvent des patients.
- Bionettoyage des salles d'attente, bras des fauteuils et poignées de portes en fin de consultation et en fin de traitement.

**Dans la situation actuelle, l'ensemble des personnels médicaux et paramédicaux au contact du patient doit porter un masque chirurgical. Ces masques doivent être changés toutes les 4 h.**

– **En cas d'examen ou de soin de patients « suspects » ou « confirmés » COVID-19** : Les mesures d'hygiène suivantes sont à mettre en œuvre en plus des précautions standards :

- Port d'un masque de soins chirurgical au minimum, FFP2 de préférence, **pour le patient et pour le soignant.**
- **Protection de sa tenue professionnelle par une surblouse à usage unique à manches longues.**
- Prévention d'une éventuelle projection dans les yeux **par le port systématique de lunettes de protection.**
- **Port d'une protection complète de la chevelure** (charlotte, calot couvrant, etc.).
- **Réalisation avec une rigueur absolue des gestes d'hygiène des mains par friction avec une solution hydroalcoolique.**
- *Les indications du port de gants à usage unique reste limitées aux situations de contact ou de risque de contact avec du sang, des liquides biologiques, une muqueuse ou la peau lésée.*

## **IL FAUT BIEN SÛR SUIVRE LES RECOMMANDATIONS DES INFECTIOLOGUES ET DES RÉFÉRENTS HYGIÉNISTES DE VOS ÉTABLISSEMENTS.**

– **Conduite à tenir devant un patient ou un personnel ayant été en contact rapproché à moins d'un mètre pendant au moins 15 minutes sans équipement de protection, notamment de masque, avec un cas « confirmé » COVID-19 + :**

- Surveillance de la température 2 fois par jour et de l'apparition de symptôme.
- Masque chirurgical en continu sur le lieu de travail.
- Frictions avec SHA rigoureuses et répétées.

Si apparition de fièvre ou symptômes : port du masque de soins en continu, consultation de la médecine du travail si disponible, arrêt de travail de 7 jours, consultation avec un référent infectiologue qui prescrira une PCR diagnostique. Les soins seront adaptés à l'évaluation du risque personnel.

## Tenue du professionnel pour le contact avec le patient

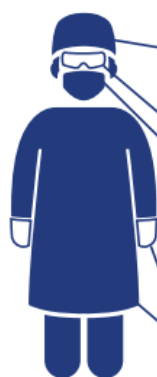

### Procéder aux actions suivantes :

- Hygiène des mains par réalisation d'une friction hydroalcoolique
- Protection complète de la chevelure (charlotte, calot couvrant...)
- Port de lunettes de protection
- Port d'un masque de type FFP2 en s'assurant de l'étanchéité au visage
- Port de gants non stériles à usage unique si nécessaire
- Port d'une surblouse à usage unique à manches longues

- L'apprentissage de l'habillage et du déshabillage est très important. Il est conseillé de se référer aux 2 tutoriels suivants :

<https://www.youtube.com/watch?v=ORIWS9BS9R8&t=1806s>

<https://www.youtube.com/watch?v=TEjk4SfMkF8>

## 2) Modes d'organisation :

- **Privilégier la prise en charge des patients en cours et des nouveaux patients**
- Reporter les consultations de surveillance à distance du dernier traitement spécifique (radiothérapie, curiethérapie, chimiothérapie, biothérapie, etc.), et favoriser si vous le pouvez la téléconsultation.
- **En ce qui concerne la curiethérapie :**
  - Interdiction d'accès du bloc opératoire à toute personne non indispensable et limitation au strict minimum du nombre d'intervenants.
  - Privilégier les interventions sous anesthésie locale/ALR/rachianesthésie pour éviter les risques liés aux intubations trachéales.
  - Limiter l'occupation des blocs opératoires en reportant et/ou annulant les traitements non urgents, les traitements adjuvants, et les traitements pour lesquels la surveillance est une option (par exemple : curiethérapie du fond vaginal des cancers de l'endomètre, curiethérapie par grains d'iode 125 pour les cancers de prostate).
  - Privilégier les traitements de tumeurs en place (col utérin, cancers ORL, verge, pédiatrie).
  - Privilégier les schémas nécessitant une implantation unique (versus implantations répétées).
  - Les masques à visière sont recommandés pour toutes personnes sur le champ opératoire et si possible les masques FFP2 sont recommandés pour un geste à risque sur la sphère cervicofaciale.
  - Les consignes d'hygiène renforcée propres à chaque bloc opératoire ou à chaque service d'hospitalisation s'appliquent pour l'éviction des patients contaminés.

- Réorganiser les salles d'attente pour éviter le croisement des patients les plus fragiles avec les patients potentiellement « contacts », ou a fortiori « infectés » ; augmenter les distances entre les patients dans les salles d'attente ; réduire les temps d'attente, supprimer les vecteurs matériels potentiels communs comme les gobelets, revues, etc.
- **Adapter les modes d'organisation** au statut viral des patients, à leurs « fragilités », et à la disponibilité des personnels médicaux et non médicaux :
  - **En mode « classique » (fonctionnement habituel, personnels en nombre, etc.)** : le circuit des patients « contacts » et « prouvés » doit être séparé du circuit des patients « fragiles » et « immunodéprimés » :

Les patients « contacts » et « prouvés » doivent être pris en charge selon les mêmes recommandations d'organisation que pour les patients « BMR », à savoir :

- Regroupement en fin de journée.
- Limiter le temps passé dans le service (séance, consultation en cours de traitement, etc.).
- Protection maximale pour les personnels.
- Nettoyage complet de la salle, de la table et des accessoires après chaque séance ou après la consultation selon les modalités décrites plus haut.
- Un seul manipulateur en salle pour la mise en place, le second restant au pupitre.

– **En mode « adapté » (personnels absents, etc.)** : dans le contexte actuel et dans la perspective d'un absentéisme important des personnels médicaux et non médicaux, un mode « adapté » peut être envisagé à titre **exceptionnel et transitoire** :

- **Priorisation des indications** : priorité aux patients traités pour une tumeur en place non opérée ou non opérable, notamment un cancer ORL, un cancer du col utérin, un cancer du poumon, etc., par rapport aux patients traités pour un cancer de la prostate, adressés pour une radiothérapie adjuvante, etc. Classiquement, la prise en charge oncologique relève de stratégies (**Recommandations du HCSP** : <https://www.hcsp.fr>) :

- 1) Soit curatives pour les maladies localisées, ou pour certains cancers avancés/métastatiques caractérisés par une sensibilité particulière aux traitements (tumeurs germinales, cancers de la thyroïde) ou une histoire de la maladie qui les rendent curables

par traitement médical, chirurgical ou par radiothérapie (cancer du côlon–rectum, cancer du rein oligométastatique, etc.).

- 2) Soit palliatives (non-curatives) pour les maladies trop avancées pour être curables.

*La hiérarchisation dans le choix des patients à prendre charge devra intégrer la nature de la stratégie thérapeutique (curative versus palliative), l'âge des patients, l'espérance de vie probable, et le caractère récent ou non du diagnostic.*

La priorisation pourrait suivre l'ordre décroissant suivant :

- 1) Patients atteints de cancers dont la stratégie thérapeutique est curative, en privilégiant les patients < 60 ans et/ou dont l'espérance de vie est supérieure à 5 ans.
- 2) Patients atteints de cancers dont la stratégie thérapeutique est palliative d'âge jeune (< 60 ans).
- 3) Patients atteints de cancers dont la stratégie thérapeutique est palliative en début de prise en charge (1<sup>re</sup> ligne thérapeutique).
- 4) Les autres patients atteints de cancers dont la stratégie thérapeutique est palliative.

**Chaque cas doit être évalué par le médecin référent du patient et les priorisations doivent être discutées et décidées au sein de chaque service.**

*Toutes interruptions ou modifications de la radiothérapie prévue en raison de problèmes d'organisation ou d'une cause propre au patient doit être absolument inscrit dans le dossier médical. Cet enregistrement permettra un retour d'expérience et une analyse continue au sein des cellules de crise de chaque établissement. Le suivi du taux de patients déprogrammés, du taux de patients dont le traitement subit des interruptions ou des délais et le taux d'absentéisme des personnels pourraient être notés.*

- **Présence d'un seul MERM au poste de traitement** : la priorité étant la poursuite des traitements et la prise en charge sans délai des patients, l'organisation de la présence des MERM aux postes de traitement en cas d'absentéisme important doit être adaptée :
  - Les **irradiations complexes** (radiothérapie en conditions stéréotaxiques, radiothérapie en modulation d'intensité

complexes avec IGRT, mises en place, réductions, hypofractionnement > 8 Gy, curiethérapie notamment HDD, etc.) nécessitent une *vigilance particulière* et la **présence de 2 MERM** doit rester la règle. Il est recommandé que ces situations spécifiques soient restreintes dans une plage horaire où le maximum de personnels est présent : par exemple entre 10h et 16h, à adapter selon chaque service.

- Les **autres types d'irradiations** (localisations secondaires, radiothérapie en modulation d'intensité « standard », radiothérapie conformationnelle 3D "standard", etc.) sont programmés sur les autres plages horaires où au minimum un seul MERM est présent en poste. Un MERM supplémentaire « partagé » entre plusieurs accélérateurs peut être une aide complémentaire selon les possibilités et l'organisation du service.
- Les présences d'un médecin et d'un oncologue radiothérapeute **restent obligatoires** durant toute l'ouverture du plateau technique.
- Une présence par « **roulement** » des personnels médicaux et de physique médicale peut être organisée. Elle doit être tracée et ajustée aux possibilités et aux situations locales.
- Dans cette situation en mode « *adapté* », il est essentiel de rester particulièrement **vigilant aux barrières de défense** que sont la constitution d'un dossier médical complet avant la radiothérapie, la validation médicale des indications, des contours et de la planimétrie, la double validation du plan de traitement par les médecins et une file active de patients traités sous chaque appareil adaptée à cette situation exceptionnelle afin de garantir la sécurité du patient, la qualité des soins et la délivrance de l'irradiation conforme à la prescription. ***Ce mode « adapté » dépend de l'organisation de chaque service et doit être mis en œuvre de manière optimale avec la cellule de gestion des risques de l'établissement.***

**L'information, voire l'accord, de l'ARS dont dépend l'établissement peut être obligatoire selon les régions pour déroger au mode « classique ».**

- **Cas particuliers :**

- 1 – **absences en nombre des médecins** : selon l'évolution de la situation et/ou de situations particulières régionales (effectifs de physique médicale ne permettant plus la continuité des soins en termes

de qualité et de gestion des risques), au cas par cas, un soutien en cours d'évaluation aux équipes de physique médicale pourrait être proposé par :

- Appel aux étudiants DQPRM, aux étudiants en thèse ayant le DQPRM, aux physiciens médicaux et aux dosimétristes retraités, dans la mesure où au moins un référent technique (physicien médical) de l'établissement est présent dans l'établissement.
- Sollicitation des physiciens médicaux de médecine nucléaire et d'imagerie ayant une activité partagée avec la radiothérapie externe.
- Soutien d'autres centres régionaux disposant d'un effectif suffisant.

**2 – absences en nombre des oncologues radiothérapeutes :** selon l'évolution de la situation et/ou de situations particulières régionales (effectifs médicaux ne permettant plus la continuité des soins), au cas par cas, un soutien pourrait être proposé par d'autres centres régionaux.

**Une évaluation des besoins au cas par cas serait réalisée dans le cadre d'une coordination régionale. La notification de ce soutien par l'ARS et l'ASN dont dépend l'établissement est obligatoire.**

**3 – Mode « adapté » appliqué à l'organisation et à la mise en œuvre des contrôles qualité (CQ) :** *le physicien médical doit s'assurer de la constance des paramètres des accélérateurs en utilisation clinique.* Pour assurer cette mission en mode « adapté », des extensions d'horaires de travail des professionnels de physique médicale (physiciens, techniciens, dosimétristes, aide physiciens, etc.) seraient nécessaires.

Une **priorisation** concernant le contrôle de qualité des accélérateurs est également recommandée :

- *Après panne et avant utilisation clinique :* réalisation du CQ réglementaire ANSM + contrôles faits habituellement par le centre qui sont spécifiques aux techniques de traitement utilisées (RCMI, irradiations en conditions stéréotaxiques).
- *Contrôles réglementaires ANSM* selon décision 2007 priorités en fonction du temps disponible pour le traitement des patients, les contrôles de qualité directement associés aux systèmes de contrôle de la dose (débit de dose de référence, symétrie, homogénéité), au contrôle géométrique des imageurs utilisés pour le



positionnement du patient, contrôles de sécurité (ouverture des portes, voyants, etc.).

- *Pour les traitements par RCMI* : contrôle de qualité pré clinique du plan de traitement du patient est à envisager en substitution des contrôles listés ci-dessus (à l'exclusion des contrôles de qualité après panne).
- *Pour les traitements en conditions stéréotaxiques* : contrôle géométrique type Winston-Lutz (ou équivalent) + contrôle de superposition des isocentres du ou des imageurs avec celui de l'accélérateur.

**Prestataires externes** : les constructeurs d'accélérateurs ont fait savoir qu'ils ajournaient les maintenances préventives en gardant cependant un service minimum pour les interventions curatives. Un contact **anticipé** de chaque centre avec ses correspondants est encouragé pour prévenir et adapter son organisation à une possible panne. L'arrêt des maintenances préventives est de la responsabilité des constructeurs.

*Pour le Bureau de la SFRO<sup>1</sup>  
Pr Philippe Giraud  
Président de la SFRO*

*Pour le Bureau du SNRO<sup>2</sup>  
Dr Erik Monpetit  
Président du SNRO*

*Pour le Bureau de la SFPM<sup>3</sup>  
M. Arnaud Dieudonné  
Président de la SFPM*

*Version 2.0 du 19/03/2020*

---

<sup>1</sup> Pour le bureau de la SFRO : D. Azria, I. Barillot, P.-É. Cailleux, C. Chargari, P. Giraud, J.M. Hannoun-Lévi, C. Hennequin, M. Lapeyre, I. Latorzeff, F. Lorchel, P. Maingon, E. Monpetit, D. Peiffert, N. Pourel, F. Rocher

<sup>2</sup> Pour le bureau du SNRO : N. Barbet, R.-J. Bensadoun, P.-É. Cailleux, F. Darlois, F. Denis, A. Hasbini, I. Marquis, E. Monpetit, Y. Pointreau, F. Rocher, É. Teissier

<sup>3</sup> Pour le bureau de la SFPM : A. Dieudonné, M. Bardiés, J. Darréon, C. Dejean, A. Lisbona, V. Marchesi
